# Supplementary material for: Dynamics of Anti-SARS-CoV-2 IgA and IgG Responses and Their Protective Effect against Fatal Disease after Booster COVID-19 Vaccination
Source: MDPI journal article supplement (doi:10.3390/vaccines12010012), 2023-12-21
Supplement: s1 [file s1]

**Supplementary Table S2.** Clinical and laboratory characteristics of vaccinated participants who died from COVID-19

| No   | Age | Sex    | Medical history –<br>comorbidities                                                         | Antibody responses on day 90 after vaccination *       |                                            |                                            | Comments                                                                                                                                                               |
|------|-----|--------|--------------------------------------------------------------------------------------------|--------------------------------------------------------|--------------------------------------------|--------------------------------------------|------------------------------------------------------------------------------------------------------------------------------------------------------------------------|
|      |     |        |                                                                                            | 1 <sup>st</sup> and 2 <sup>nd</sup> dose<br>(BNT162b2) | 1 <sup>st</sup> booster dose<br>(BNT162b2) | 2 <sup>nd</sup> booster dose<br>(BNT162b2) |                                                                                                                                                                        |
| #477 | 62  | Female | Systemic scleroderma,<br>atrial fibrillation,<br>hypothyroidism,<br>osteoporosis, epilepsy | IgG 134.6 AU/mL,<br>IgA 1.65 U/mL                      | Non-estimated                              |                                            | SARS-CoV-2 infection and death<br>before day 90 after the 1 <sup>st</sup><br>booster vaccination                                                                       |
| #359 | 100 | Female | Hypertension, diabetes<br>mellitus, hypothyroidism,<br>depression                          | IgG 1,534.1 AU/mL,<br>IgA 7.63 U/mL                    | IgG 10,083.1 AU/mL,<br>IgA 74.81 U/mL      |                                            | SARS-CoV-2 infection and death<br>173 days after booster<br>vaccination                                                                                                |
| #389 | 70  | Male   | Parkinson's disease, mental<br>retardation, organic<br>psychosis, prostate<br>hyperplasia  | IgG 202.0 AU/mL,<br>IgA 36.41 U/mL                     | IgG 1,907.3 AU/mL,<br>IgA 14.71 U/mL       |                                            | SARS-CoV-2 infection and death<br>260 days after booster<br>vaccination                                                                                                |
| #354 | 65  | Female | Down's syndrome,<br>dyslipidemia, osteoporosis                                             | IgG 737.4 AU/mL,<br>IgA 9.93 U/mL                      | IgG 3,203.9 AU/mL,<br>IgA 43.61 U/mL       |                                            | 1 <sup>st</sup> SARS-CoV-2 infection 127<br>days after booster vaccination;<br>2 <sup>nd</sup> SARS-CoV-2 infection and<br>death 389 days after booster<br>vaccination |
| #459 | 93  | Female | Dementia, osteoarthritis                                                                   | IgG 553.0 AU/mL,<br>IgA 3.12 U/mL                      | IgG 7,312.4 AU/mL,<br>IgA 21.23 U/mL       | IgG 11,461.0 AU/mL,<br>IgA 41.07 U/mL      | Disease and death 112 days after<br>the 2 <sup>nd</sup> booster vaccination                                                                                            |

\* The cut-off values for antibody responses after vaccination were 50 AU/mL for IgG anti-SARS-CoV-2 levels and 10 U/mL for IgA anti-SARS-CoV-2 levels.
