# Supplementary material for: Dynamics of Anti-SARS-CoV-2 IgA and IgG Responses and Their Protective Effect against Fatal Disease after Booster COVID-19 Vaccination
Source: MDPI journal article supplement (doi:10.3390/vaccines12010012), 2023-12-21
Supplement: s1 [file s1]

**Supplementary Table S7.** Magnitude of IgA anti-SARS-CoV-2 responses on day 90 after the second booster vaccination in relation to comorbidities and history of SARS-CoV-2 infection.

| Parameter                              | No, IgA levels (U/mL)<br>(Median, IQR)           | p-value<br>(Univariate analysis) | p-value<br>(Multivariate analysis) | Coefficient (95% CI)  |
|----------------------------------------|--------------------------------------------------|----------------------------------|------------------------------------|-----------------------|
| Sex (male/female)                      | Male: 60, 31.2, 27.2<br>Female: 67, 36.0, 40.8   | 0.362                            | 0.256                              | 4.13 (-3.04 – 11.29)  |
| Age (years)                            | Rho = -0.09                                      | 0.347                            | 0.762                              | 0.05 (-0.26 – 0.35)   |
| Comorbidities (no VS $\geq 1$ )        | No: 6, 22.3, 44.7<br>$\geq 1$ : 121, 33.9, 32.5  | 0.378                            |                                    |                       |
| Comorbidities (1 VS $\geq 2$ )         | one: 60, 34.7, 40.9<br>$\geq 2$ : 67, 30.7, 26.4 | 0.527                            |                                    |                       |
| Hypertension                           | No: 55, 38.2, 29.8<br>Yes: 72, 28.4, 37.2        | 0.152                            | 0.336                              | -3.80 (-11.58 – 3.99) |
| Diabetes mellitus                      | No: 95, 34.6, 32.7<br>Yes: 32, 28.6, 36.8        | 0.545                            |                                    |                       |
| Dyslipidemia                           | No: 87, 30.6, 34.7<br>Yes: 40, 38.2, 33.1        | 0.132                            | 0.259                              | 4.41 (-3.29 – 12.11)  |
| Chronic heart disease                  | No: 92, 34.1, 35.0<br>Yes: 35, 31.8, 33.2        | 0.892                            |                                    |                       |
| Stroke/TIA                             | No: 107, 34.3, 37.9<br>Yes: 20, 27.1, 20.3       | 0.138                            | 0.435                              | -3.89 (-13.74 – 5.96) |
| Venous/arterial thromboses             | No: 119, 32.9, 32.1<br>Yes: 8, 36.3, 37.2        | 0.928                            |                                    |                       |
| Chronic respiratory disease            | No: 118, 33.9, 33.4<br>Yes: 9, 30.5, 28.8        | 0.880                            |                                    |                       |
| Autoimmune/ autoinflammatory disorders | No: 115, 34.0, 35.9<br>Yes: 12, 27.2, 27.0       | 0.337                            |                                    |                       |
| Thyroid disease                        | No: 118, 34.1, 32.5<br>Yes: 9, 26.9, 40.1        | 0.287                            |                                    |                       |

|                                                                        |                                                                                |                  |                  |                         |
|------------------------------------------------------------------------|--------------------------------------------------------------------------------|------------------|------------------|-------------------------|
| Chronic liver disease                                                  | No: 123, 34.0, 35.2<br>Yes: 4, 13.5, 37.5                                      | 0.082            | 0.725            | -3.67 (-24.35 – 17.00)  |
| Chronic kidney disease                                                 | No: 119, 34.1, 34.8<br>Yes: 8, 18.7, 36.4                                      | 0.077            | 0.076            | -13.78 (-29.03 – 1.48)  |
| Cancer                                                                 | No: 122, 34.0, 33.0<br>Yes: 5, 26.1, 48.0                                      | 0.218            |                  |                         |
| Insomnia/psychiatric diseases                                          | No: 133, 27.4, 37.0<br>Yes: 118, 34.7, 35.2                                    | 0.153            | 0.573            | -2.33 (-10.50 – 5.84)   |
| Others                                                                 | No: 146, 38.8, 43.1<br>Yes: 105, 28.6, 24.4                                    | 0.166            | 0.551            | -2.47 (-10.68 – 5.73)   |
| History of SARS-CoV-2 infection                                        | No: 42, 16.8, 24.0<br>Yes (once): 68, 38.9, 42.1<br>Yes (twice): 16, 42.9 16.8 | <b>&lt;0.001</b> | <b>&lt;0.001</b> | 11.05 (5.58 – 16.52)    |
| Vaccination type (bivalent BA.1 & BA. 4/5 VS monovalent mRNA vaccines) | BA1 & BA4/5: 34, 27.3, 6.2<br>BNT162b2: 93, 38.7, 47.3                         | 0.062            | <b>0.004</b>     | -12.91 (-21.58 – -4.23) |

Abbreviations: IQR, interquartile range; TIA, transient ischemic attack; 95%CI, 95% confidence interval
