# Supplementary material for: Dynamics of Anti-SARS-CoV-2 IgA and IgG Responses and Their Protective Effect against Fatal Disease after Booster COVID-19 Vaccination
Source: MDPI journal article supplement (doi:10.3390/vaccines12010012), 2023-12-21
Supplement: s1 [file s1]

**Supplementary Table S9.** Multiple regression analysis of anti-SARS-CoV-2 IgG and IgA responses on day 90 after booster vaccination doses..

|                                   | First booster vaccination |                           | Second booster vaccination |                         | Third booster vaccination |                          |
|-----------------------------------|---------------------------|---------------------------|----------------------------|-------------------------|---------------------------|--------------------------|
|                                   | (No 251)                  |                           | (No 126)                   |                         | (No 34)                   |                          |
|                                   | <i>p</i> -value           | Coeff. (95% CI)           | <i>p</i> -value            | Coeff. (95% CI)         | <i>p</i> -value           | Coeff. (95% CI)          |
| <b>anti-SARS-CoV-2 IgG levels</b> |                           |                           |                            |                         |                           |                          |
| Sex (male/female)                 | 0.866                     | 372 (-3,978 – 4,723)      | 0.252                      | 5,164 (-3,727 – 14,055) | 0.501                     | 6,697 (-13,425 – 26,820) |
| Age                               | 0.249                     | 80 (-57 – 217)            | 0.488                      | 117 (-216 – 450)        | 0.602                     | -230 (-1,125 – 644)      |
| Comorbidities (≥ 1VS 0-ref)       | 0.281                     | -2,739 (-7,734 – 2,256)   | 0.974                      | -152 (-9,419 – 9,116)   | NA **                     |                          |
| History of SARS-CoV-2 infection   | <b>&lt;0.001</b>          | 21,021 (16,939 – 25,103)  | <b>&lt;0.001</b>           | 15,257 (8,736 – 21,779) | 0.330                     | 8,281 (-8,830 – 25,393)  |
| Vaccine type *                    | <b>0.018</b>              | -7,492 (-13,681 – -1,302) | <b>0.003</b>               | 15,580 (5,519 – 25,642) | NA ***                    |                          |
| <b>anti-SARS-CoV-2 IgA levels</b> |                           |                           |                            |                         |                           |                          |
| Sex (male/female)                 | 0.795                     | 0.40 (-3.40 – 2.61)       | 0.184                      | 4.98 (-2.39 – 12.36)    | 0.264                     | 9.82 (-7.81 – 27.45)     |
| Age                               | 0.302                     | -0.06 (-0.05 – 0.16)      | 0.332                      | -0.14 (-0.43 – 0.15)    | 0.467                     | -0.28 (-1.06 – 0.50)     |
| Comorbidities (≥ 1VS 0-ref)       | <b>0.003</b>              | -7.26 (-11.95 – -2.57)    | 0.768                      | 3.20 (-18.21 – 24.60)   | NA **                     |                          |
| History of SARS-CoV-2 infection   | <b>&lt;0.001</b>          | 8.76 (5.99 – 11.53)       | <b>&lt;0.001</b>           | 11.21 (5.89 – 16.52)    | 0.356                     | 6.89 (-8.11 – 21.89)     |
| Vaccine type *                    | <b>0.004</b>              | -6.17 (-10.32 – -2.03)    | <b>0.013</b>               | -10.90 (-19.47 – -2.34) | NA ***                    |                          |

Abbreviations: CI, confidence intervals; NA, non-available; Coeff., coefficient.

\*The comparison of vaccine type concerns the adenovirus vector-based vaccines VS monovalent mRNA of the initial vaccination before the first booster dose, and the bivalent vaccines (BA.1 or BA.4/5) VS monovalent after the second booster dose.

\*\*All vaccinated individuals with the third booster dose displayed at least one comorbidity.

\*\*\*All individuals vaccinated by the bivalent BA.4/5 vaccine.
