# Supplementary material for: Dynamics of Anti-SARS-CoV-2 IgA and IgG Responses and Their Protective Effect against Fatal Disease after Booster COVID-19 Vaccination
Source: MDPI journal article supplement (doi:10.3390/vaccines12010012), 2023-12-21
Supplement: s1 [file s1]

**Supplementary Table S6.** Magnitude of IgA anti-SARS-CoV-2 responses on day 90 after the first booster vaccination in relation to comorbidities and history of SARS-CoV-2 infection

| Parameter                              | No, IgG levels (U/mL) (Median, IQR)                | p-value (Univariate analysis) | p-value (Multivariate analysis) | Coefficient (95% CI) |
|----------------------------------------|----------------------------------------------------|-------------------------------|---------------------------------|----------------------|
| Sex (male/female)                      | Male: 113, 13.8, 17.2<br>Female: 138, 21.0, 21.1   | 0.777                         | 0.836                           | -32.0 (-2.74 – 3.38) |
| Age (years)                            | Rho = 0.07                                         | 0.285                         | 0.971                           | -0.02 (-10.0 – 0.09) |
| Comorbidities (no VS $\geq 1$ )        | No: 49, 26.8, 19.8<br>$\geq 1$ : 202, 18.7, 16.8   | <b>0.018</b>                  |                                 |                      |
| Comorbidities (1 VS $\geq 2$ )         | one: 148, 18.7, 19.9<br>$\geq 2$ : 103, 19.8, 17.5 | 0.291                         |                                 |                      |
| Hypertension                           | No: 135, 20.8, 20.2<br>Yes: 116, 18.3, 18.2        | 0.364                         |                                 |                      |
| Diabetes mellitus                      | No: 200, 20.0, 19.6<br>Yes: 51, 18.8, 16.9         | 0.678                         |                                 |                      |
| Dyslipidemia                           | No: 173, 18.8, 19.2<br>Yes: 78, 20.7, 18.6         | 0.528                         |                                 |                      |
| Chronic heart disease                  | No: 200, 18.9, 19.2<br>Yes: 51, 20.8, 19.4         | 0.315                         |                                 |                      |
| Stroke/TIA                             | No: 228, 19.9, 19.8<br>Yes: 23, 17.9, 12.4         | 0.364                         |                                 |                      |
| Venous/arterial thromboses             | No: 241, 19.2, 19.5<br>Yes: 10, 21.8, 13.4         | 0.684                         |                                 |                      |
| Chronic respiratory disease            | No: 240, 19.7, 19.0<br>Yes: 11, 11.2, 22.3         | 0.306                         |                                 |                      |
| Autoimmune/ autoinflammatory disorders | No: 236, 19.2, 19.4<br>Yes: 15, 20.8, 13.5         | 0.901                         |                                 |                      |
| Thyroid disease                        | No: 224, 20.6, 17.9<br>Yes: 27, 12.2, 21.5         | <b>0.019</b>                  | 0.166                           | -3.42 (-8.27 – 1.43) |

|                                                             |                                                                                |                  |                  |                           |
|-------------------------------------------------------------|--------------------------------------------------------------------------------|------------------|------------------|---------------------------|
| Chronic liver disease                                       | No: 247, 19.8, 19.1<br>Yes: 4, 8.8, 12.0                                       | 0.057            | 0.227            | -7.24 (-19.01 – 4.53)     |
| Chronic kidney disease                                      | No: 240, 19.7, 19.0<br>Yes: 11, 14.3, 21.1                                     | 0.202            |                  |                           |
| Cancer                                                      | No: 242, 19.5, 19.4<br>Yes: 9, 18.2, 20.2                                      | 0.901            |                  |                           |
| Insomnia/psychiatric diseases                               | No: 133, 17.9, 20.4<br>Yes: 118, 20.9, 16.0                                    | 0.509            |                  |                           |
| Others                                                      | No: 146, 22.1, 20.9<br>Yes: 105, 17.9, 14.1                                    | 0.113            | 0.063            | -3.37 (-6.91 – 0.18)      |
| History of SARS-CoV-2 infection                             | No: 175, 14.2, 19.8<br>Yes (once): 69, 23.7, 9.4<br>Yes (twice): 7, 38.8, 28.0 | <b>&lt;0.001</b> | <b>&lt;0.001</b> | 8.79 (6.00 – 11.58)       |
| Vaccination type (adenovirus vector-based VS mRNA vaccines) | Adenovirus vector-based:<br>42, 21.4, 17.4<br>mRNA: 209, 8.5, 22.1             | <b>&lt;0.001</b> | <b>0.006</b>     | -6.07<br>(-10.36 – -1.78) |

Abbreviations: IQR, interquartile range; TIA, transient ischemic attack; 95%CI, 95% confidence interval
