# Supplementary material for: Dynamics of Anti-SARS-CoV-2 IgA and IgG Responses and Their Protective Effect against Fatal Disease after Booster COVID-19 Vaccination
Source: MDPI journal article supplement (doi:10.3390/vaccines12010012), 2023-12-21
Supplement: s1 [file s1]

**Supplementary Table S3.** Magnitude of IgG anti-SARS-CoV-2 responses on day 90 after the first booster vaccination in relation to comorbidities and history of SARS-CoV-2 infection.

| Parameter                              | No, IgG levels (AU/mL) (Median, IQR)                      | p-value<br>(Univariate analysis) | p-value<br>(Multivariate analysis) | Coefficient (95% CI)           |
|----------------------------------------|-----------------------------------------------------------|----------------------------------|------------------------------------|--------------------------------|
| Sex (male/female)                      | Male: 113, 7,873, 18,099<br>Female: 138, 8,656, 14,570    | 0.726                            | 0.926                              | -207.4 (-4,602.0 – 4,187.3)    |
| Age (years)                            | Rho = 0.09                                                | 0.141                            | 0.218                              | 86.7 (-51.7 – 225.1)           |
| Comorbidities (no VS $\geq 1$ )        | No: 49, 8,007, 11,802<br>$\geq 1$ : 202, 8,451, 18,476    | 0.998                            |                                    |                                |
| Comorbidities (1 VS $\geq 2$ )         | one: 148, 6,839, 13,674<br>$\geq 2$ : 103, 10,573, 21,481 | 0.150                            |                                    |                                |
| Hypertension                           | No: 135, 6,500, 16,711<br>Yes: 116, 10,428, 17,808        | 0.303                            |                                    |                                |
| Diabetes Mellitus                      | No: 200, 7,654, 14,272<br>Yes: 51, 11,600, 20,640         | 0.105                            | 0.959                              | -145.5<br>(-5,753.9 – 5,462.9) |
| Dyslipidemia                           | No: 173, 8,320, 16,086<br>Yes: 78, 8,597, 17,952          | 0.814                            |                                    |                                |
| Chronic heart disease                  | No: 200, 8,251, 14,356<br>Yes: 51, 10,572, 19,232         | 0.314                            |                                    |                                |
| Stroke/TIA                             | No: 228, 8,371, 17,234<br>Yes: 23, 8,742, 9,372           | 0.392                            |                                    |                                |
| Venous/arterial thromboses             | No: 241, 8,182, 14,741<br>Yes: 10, 17,425, 20,071         | 0.266                            |                                    |                                |
| Chronic respiratory disease            | No: 240, 8,370, 15,116<br>Yes: 11, 10,369, 30,700         | 0.936                            |                                    |                                |
| Autoimmune/ autoinflammatory disorders | No: 236, 8,436, 15,073<br>Yes: 15, 7,584, 19,750          | 0.687                            |                                    |                                |
| Thyroid disease                        | No: 224, 8,495, 15,073<br>Yes: 27, 7,056, 26,589          | 0.518                            |                                    |                                |

|                                                             |                                                                                           |                  |                  |                                    |
|-------------------------------------------------------------|-------------------------------------------------------------------------------------------|------------------|------------------|------------------------------------|
| Chronic liver disease                                       | No: 247, 8,451, 16,589<br>Yes: 4, 2,639, 6,918                                            | 0.084            | 0.534            | -5,471.2<br>(-22,770.8 – 1,390.1)  |
| Chronic kidney disease                                      | No: 240, 8,370, 14,650<br>Yes: 11, 10,935, 30,194                                         | 0.880            |                  |                                    |
| Cancer                                                      | No: 242, 8,251, 14,688<br>Yes: 9, 23,879, 28,033                                          | 0.387            |                  |                                    |
| Insomnia/psychiatric diseases                               | No: 133, 6,910, 11,354<br>Yes: 118, 10,530, 21,575                                        | 0.167            | 0.153            | -3,705.1<br>(-8,800.3 – 1,390.1)   |
| Others                                                      | No: 146, 7,939, 14,921<br>Yes: 105, 8,857, 18,117                                         | 0.844            |                  |                                    |
| History of SARS-CoV-2 infection                             | No: 175, 5,942, 8,987<br>Yes (once): 69, 20,307, 28,326<br>Yes (twice): 7, 65,688, 40,550 | <b>&lt;0.001</b> | <b>&lt;0.001</b> | 21309.6<br>(17151.2 – 25468.0)     |
| Vaccination type (adenovirus vector-based VS mRNA vaccines) | Adenovirus vector-based:<br>42, 4,453, 7,349<br>mRNA: 209, 9,903, 18,693                  | <b>0.002</b>     | <b>0.011</b>     | -8,322.7<br>(-14,760.5 – -1,884.9) |

Abbreviations: IQR, interquartile range; TIA, transient ischemic attack; 95%CI, 95% confidence interval
