# Supplementary material for: Dynamics of Anti-SARS-CoV-2 IgA and IgG Responses and Their Protective Effect against Fatal Disease after Booster COVID-19 Vaccination
Source: MDPI journal article supplement (doi:10.3390/vaccines12010012), 2023-12-21
Supplement: s1 [file s1]

**Supplementary Table S8.** Magnitude of IgA anti-SARS-CoV-2 responses on day 90 after the third booster vaccination (bivalent BA.4/5) in relation to comorbidities and history of SARS-CoV-2 infection.

| Parameter                                 | N, IgA levels (U/mL)<br>(Median, IQR)                                       | p-value,<br>(Univariate analysis) | p-value<br>(Multivariate analysis) | Coefficient (95%<br>CI) |
|-------------------------------------------|-----------------------------------------------------------------------------|-----------------------------------|------------------------------------|-------------------------|
| Sex (male)                                | Male: 15, 41.8, 57.0<br>Female: 19, 65.8, 29.7                              | 0.242                             | 0.264                              | 9.82 (-7.81 – 27.45)    |
| Age (years)                               | Rho=-0.15                                                                   | 0.398                             | 0.467                              | -0.28 (-1.06 – 0.50)    |
| Comorbidity (no VS >= 1)                  | No:0<br>Yes: 34, 61.2, 37.7                                                 | -                                 |                                    |                         |
| Comorbidity (0 VS >=2)                    | No: 21, 64.5, 32.2<br>Yes: 13, 41.8, 43.7                                   | 0.576                             |                                    |                         |
| Hypertension                              | No: 14, 66.9, 31.8<br>Yes: 20, 58.0, 52.1                                   | 0.823                             |                                    |                         |
| Diabetes mellitus                         | No: 27, 64.5, 33.4<br>Yes: 7, 38.7, 43.2                                    | 0.934                             |                                    |                         |
| Dyslipidemia                              | No: 17, 63.9, 42.2<br>Yes: 17, 57.4, 40.3                                   | 0.394                             |                                    |                         |
| Chronic heart disease                     | No: 27, 64.5, 31.8<br>Yes: 7, 27.9, 54.9                                    | 0.588                             |                                    |                         |
| Stroke/ TIA                               | No: 32, 64.2, 42.5<br>Yes: 2, 39.5, -                                       | -                                 |                                    |                         |
| Venous/ arterial thromboses               | No: 33, 63.9, 40.3<br>Yes: 1                                                | -                                 |                                    |                         |
| Chronic respiratory disease               | No: 33, 58.5, 39.3<br>Yes: 1                                                | -                                 |                                    |                         |
| Autoimmune/<br>autoinflammatory disorders | No: 32, 64.2, 42.9<br>Yes: 2, 39.3, -                                       | -                                 |                                    |                         |
| Thyroid disease                           | No: 31, 63.9, 36.2<br>Yes: 3, 38.7, -                                       | -                                 |                                    |                         |
| Chronic liver disease                     | No: 34, 61.2, 37.7<br>Yes:0                                                 | -                                 |                                    |                         |
| Chronic kidney disease                    | No: 33, 63.9, 34.9<br>Yes: 1                                                | -                                 |                                    |                         |
| Cancer                                    | No: 34, 61.2, 37.7<br>Yes: 0                                                | -                                 |                                    |                         |
| Insomnia/ psychiatric<br>diseases         | No: 10, 61.0, 36.6<br>Yes: 24, 61.2, 43.5                                   | 0.724                             |                                    |                         |
| Other                                     | No: 16, 64.2, 36.0<br>Yes: 18, 58.0, 44.1                                   | 0.695                             |                                    |                         |
| History of SARS-CoV-2<br>infection        | No: 14, 42.2, 56.3<br>Yes (once): 18, 67.4, 29.7<br>Yes (twice): 2, 50.7, - | 0.094                             | 0.356                              | 6.89 (-8.11 – 21.89)    |

Abbreviations: IQR, interquartile range; 95%CI, 95% confidence interval
