# Supplementary material for: Dynamics of Anti-SARS-CoV-2 IgA and IgG Responses and Their Protective Effect against Fatal Disease after Booster COVID-19 Vaccination
Source: MDPI journal article supplement (doi:10.3390/vaccines12010012), 2023-12-21
Supplement: s1 [file s1]

**Supplementary Table S5.** Magnitude of IgG anti-SARS-CoV-2 responses on day 90 after the third booster vaccination (bivalent BA.4/5) in relation to comorbidities and history of SARS-CoV-2 infection.

| Parameter                                 | N, IgG levels (AU/mL)<br>(Median, IQR)                                                | p-value<br>(Univariate analysis) | p-value<br>(Multivariate analysis) | Coefficient<br>(95% CI)  |
|-------------------------------------------|---------------------------------------------------------------------------------------|----------------------------------|------------------------------------|--------------------------|
| Sex (male)                                | Male: 15, 20,776, 29,267<br>Female: 19, 26,636, 47,449                                | 0.242                            | 0.517                              | 6,342 (-13,434 – 26,120) |
| Age (years)                               | Rho=-0.05                                                                             | 0.781                            | 0.643                              | -199 (-1,072 – 673)      |
| Comorbidity (no VS >= 1)                  | No:0<br>Yes: 34, 25,783, 36,253                                                       | -                                |                                    |                          |
| Comorbidity (0 VS >=2)                    | No: 21, 23,228, 33,679<br>Yes: 13, 26,219, 39,993                                     | 0.576                            |                                    |                          |
| Hypertension                              | No: 14, 26,907, 29,820<br>Yes: 20, 25,783, 46,314                                     | 0.823                            |                                    |                          |
| Diabetes Mellitus                         | No: 27, 23,789, 40,760<br>Yes: 7, 26,219, 8,282                                       | 0.934                            |                                    |                          |
| Dyslipidemia                              | No: 17, 26,637, 31,544<br>Yes: 17, 23,758, 35,332                                     | 0.394                            |                                    |                          |
| Chronic heart disease                     | No: 27, 23,789, 35,706<br>Yes: 7, 26,219, 31,247                                      | 0.588                            |                                    |                          |
| stroke/ TIA                               | No: 32, 25,783, 37,564<br>Yes: 2, 14,842, -                                           | -                                |                                    |                          |
| venous/ arterial thromboses               | No: 33, 40,000, 5,636<br>Yes: 1                                                       | -                                |                                    |                          |
| Chronic respiratory disease               | No: 33, 25,353, 33,679<br>Yes: 1                                                      | -                                |                                    |                          |
| Autoimmune/<br>autoinflammatory disorders | No: 32, 24,571, 38,483<br>Yes: 2, 38,656, -                                           | -                                |                                    |                          |
| Thyroid disease                           | No: 31, 25,353, 40,760<br>Yes: 3, 30,586, -                                           | -                                |                                    |                          |
| Chronic liver disease                     | No: 34, 25,783, 36,253<br>Yes:0                                                       | -                                |                                    |                          |
| Chronic kidney disease                    | No: 33, 25,353, 33,679<br>Yes: 1                                                      | -                                |                                    |                          |
| Cancer                                    | No: 34, 25,783, 36,253<br>Yes: 0                                                      | -                                |                                    |                          |
| Chronic kidney disease and<br>cancer      | No:33, 25,353, 33,679<br>Yes:1                                                        | -                                |                                    |                          |
| Insomnia/ psychiatric diseases            | No: 10, 26,445, 52,903<br>Yes: 24, 25,783, 33,715                                     | 0.724                            |                                    |                          |
| Other                                     | No: 16, 26,216, 60,924<br>Yes: 18, 24,571, 29,169                                     | 0.695                            |                                    |                          |
| History of SARS-CoV-2 infection           | No: 14, 17,710, 29,617<br>Yes (once): 18, 28,611, 39,283<br>Yes (twice): 2, 39,118, - | 0.094 (No VS once)               | 0.308                              | 8,549 (-8,279 – 25,377)  |

Abbreviations: IQR, interquartile range; 95%CI, 95% confidence interval
