# Supplementary material for: Dynamics of Anti-SARS-CoV-2 IgA and IgG Responses and Their Protective Effect against Fatal Disease after Booster COVID-19 Vaccination
Source: MDPI journal article supplement (doi:10.3390/vaccines12010012), 2023-12-21
Supplement: s1 [file s1]

**Supplementary Table S4.** Magnitude of IgG anti-SARS-CoV-2 responses on day 90 after the second booster vaccination in relation to comorbidities and history of SARS-CoV-2 infection

| Parameter                              | No, IgG levels (AU/mL) (Median, IQR)                     | p-value<br>(Univariate analysis) | p-value<br>(Multivariate analysis) | Coefficient (95% CI)     |
|----------------------------------------|----------------------------------------------------------|----------------------------------|------------------------------------|--------------------------|
| Sex (male/female)                      | Male: 60, 18,290, 34,026<br>Female: 67, 30,590, 57,280   | 0.206                            | 0.405                              | 3,060 (-5,194 – 12,781)  |
| Age (years)                            | Rho = -0.04                                              | 0.683                            | 0.346                              | 154 (-168 – 477)         |
| Comorbidities (No VS $\geq 1$ )        | No: 6, 27,617, 49,499<br>$\geq 1$ : 121, 26,732, 45,666  | 0.690                            |                                    |                          |
| Comorbidities (1 VS $\geq 2$ )         | one: 60, 27,617, 35,573<br>$\geq 2$ : 67, 26,634, 62,229 | 0.864                            |                                    |                          |
| Hypertension                           | No: 55, 27,507, 42,439<br>Yes: 72, 26,683, 55,293        | 0.396                            |                                    |                          |
| Diabetes mellitus                      | No: 95, 26,853, 45,607<br>Yes: 32, 28,300, 40,259        | 0.942                            |                                    |                          |
| Dyslipidemia                           | No: 87, 27,728, 38,226<br>Yes: 40, 24,557, 60,279        | 0.890                            |                                    |                          |
| Chronic heart disease                  | No: 92, 34,850, 45,494<br>Yes: 35, 16,020, 39,097        | 0.181                            | 0.441                              | -3,951 (-14,080 – 6,177) |
| Stroke/TIA                             | No: 107, 26,853, 46,358<br>Yes: 20, 26,287, 42,287       | 0.461                            |                                    |                          |
| Venous/arterial thromboses             | No: 119, 27,016, 54,330<br>Yes: 8, 20,424, 32,985        | 0.392                            |                                    |                          |
| Chronic respiratory disease            | No: 118, 25,662, 38,573<br>Yes: 9, 55,676, 53,257        | 0.092                            | 0.285                              | 9,558 (-8,050 – 27,167)  |
| Autoimmune/ autoinflammatory disorders | No: 115, 27,216, 54,057<br>Yes: 12, 15,086, 34,556       | 0.252                            |                                    |                          |
| Thyroid disease                        | No: 118, 27,035, 45,445<br>Yes: 9, 26,634, 51,635        | 0.770                            |                                    |                          |

|                                                                                |                                                                                            |                  |                  |                            |
|--------------------------------------------------------------------------------|--------------------------------------------------------------------------------------------|------------------|------------------|----------------------------|
| Chronic liver disease                                                          | No: 123, 27,507, 46,631<br>Yes: 4, 11,396, 15,392                                          | 0.089            | 0.272            | -14,301 (-39,989 – 11,386) |
| Chronic kidney disease                                                         | No: 119, 26,853, 44,559<br>Yes: 8, 25,164, 58,136                                          | 0.462            |                  |                            |
| Cancer                                                                         | No: 122, 27,361, 48,395<br>Yes: 5, 8,871, 28,166                                           | 0.082            | 0.400            | -14,301 (-39,989 – 11,386) |
| Insomnia/psychiatric diseases                                                  | No: 133, 6,910, 11,354<br>Yes: 118, 10,530, 21,575                                         | 0.812            |                  |                            |
| Others                                                                         | No: 146, 7,939, 14,921<br>Yes: 105, 8,857, 18,117                                          | 0.658            |                  |                            |
| History of SARS-CoV-2 infection                                                | No: 42, 7,955, 11,992<br>Yes (once): 68, 40,000, 53,311<br>Yes (twice): 16, 21,124, 49,992 | <b>&lt;0.001</b> | <b>&lt;0.001</b> | 14,512 (7,944 – 21,081)    |
| Vaccination type (bivalent BA.1 & BA.4/5 VS monovalent mRNA BNT162b2 vaccines) | BA1 & BA4/5: 34, 40,000, 45,233<br>BNT162b2: 93, 17,917, 33,354                            | <b>0.002</b>     | <b>0.006</b>     | -14,712 (4,405 – 25,019)   |

Abbreviations: IQR, interquartile range; TIA, transient ischemic attack; 95%CI, 95% confidence interval
